# Supplementary material
Source: PubMed Central journal article supplement (PMC1994132)
Supplement: 7601832s1.pdf [file 7601832s1.pdf]

Fig.S1 Nishiwaki *et al.*

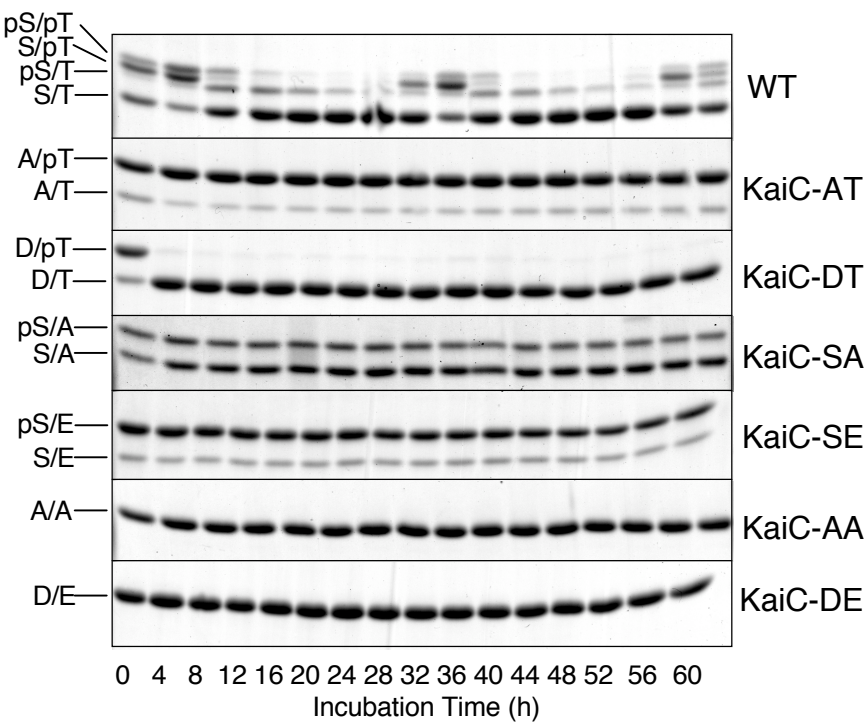

### Supplementary Figure 1

WT and mutant KaiC proteins were incubated under the standard conditions (see Materials and Methods) for 60 h. Aliquots of the reaction mixtures were collected every 4 h and subjected to SDS-PAGE. None of the mutant KaiC proteins exhibited rhythmicity.
